# Supplementary material
Source: publisher figshare collection journal article supplement (https://tandf.figshare.com/ndownloader/files/12169163)
Supplement: Supplementary file 1 [file 12169163]

Editor

Autophagy

May 2, 2018

Dear Editor,

**RE: Manuscript ID: 2017AUTO0642R1 entitled " *Inhibition of TRAF6 ubiquitin-ligase activity by PRDX1 leads to inhibition of NFKB activation and autophagy activation ”* by, Yoon Min, Mi-Jeong Kim, Sena Lee, Eunyoung Chun, and myself.**

First of all, we deeply appreciate your kinds and helps about our manuscript. Herein, we would like to submit our revised manuscript entitled “***Inhibition of TRAF6 ubiquitin-ligase activity by PRDX1 leads to inhibition of NFKB activation and autophagy activation*** ". As following assistant editor's comments, we revised the text, figures and/or figure legends and figure labels of the manuscript.

Once again, we deeply appreciate your kinds and helps.

|  |
| --- |

Best regards,

Ki-Young Lee, Ph.D.

Professor

Sungkyunkwan University School of Medicine, Korea
